# Supplementary material for: CHD7 and 53BP1 regulate distinct pathways for the re-ligation of DNA double-strand breaks
Source: PubMed Central journal article supplement (PMC7666215; doi:10.1038/s41467-020-19502-5), 2020-11-13
Supplement: 41467_2020_19502_MOESM2_ESM.pdf [file 41467_2020_19502_MOESM2_ESM.pdf]

## **Description of Additional Supplementary Files**

File Name: Supplementary Data 1

Description: Average number of 53BP1 and  $\gamma$ H2AX foci per nucleus upon siRNA-mediated depletions in the U2OS-shRNF168 background

File Name: Supplementary Data 2

Description: RNA sequencing analysis of HEK293T cells transfected with control Luciferase siRNA or siRNAs against CHD7

File Name: Supplementary Data 3

Description: Proteins identified as interactors of CHD7 by SILAC LC-MS/MS
